# Supplementary material for: Low‐Dose Copper Exposure Exacerbates Depression‐Like Behavior in ApoE4 Transgenic Mice
Source: Hindawi journal article supplement (doi:10.1155/2021/6634181), 2021-01-01

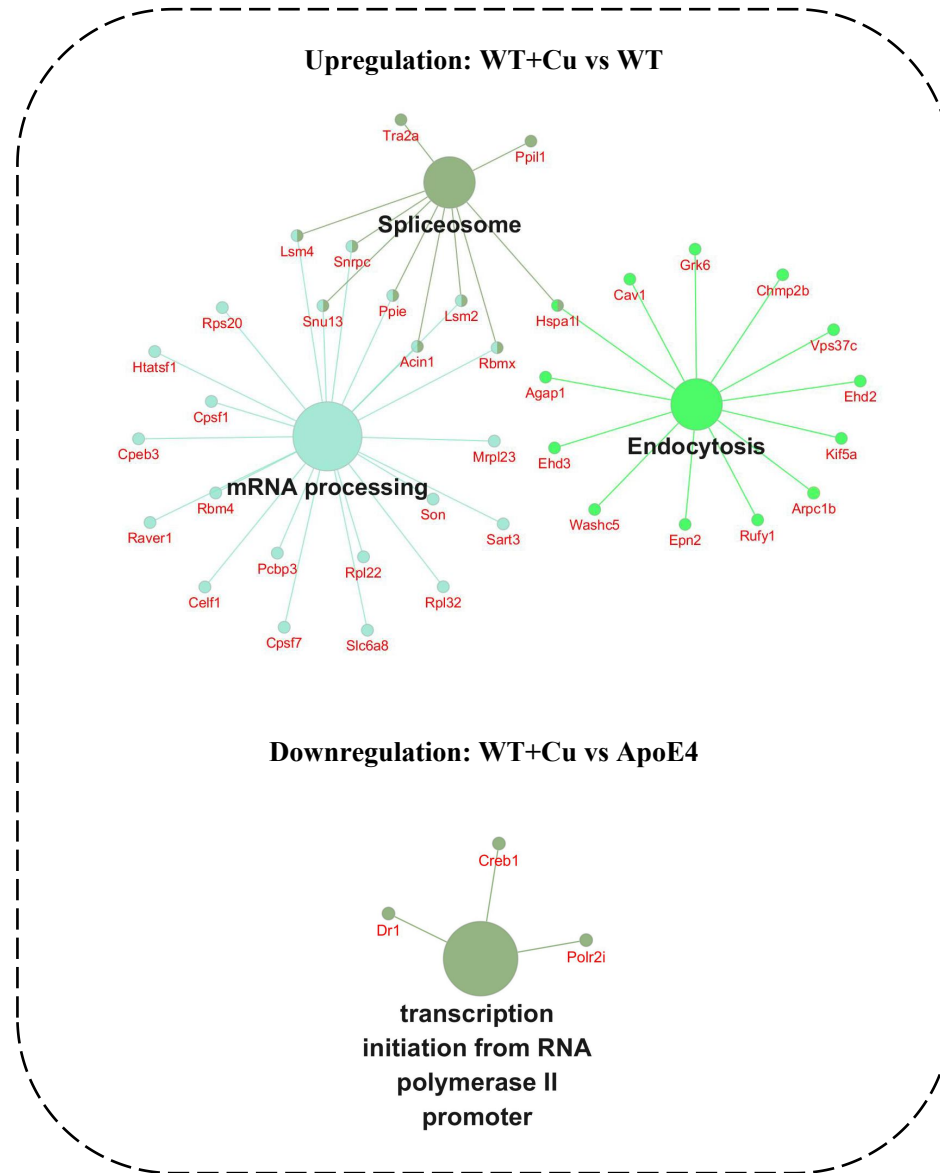

Supplementary Figure 1

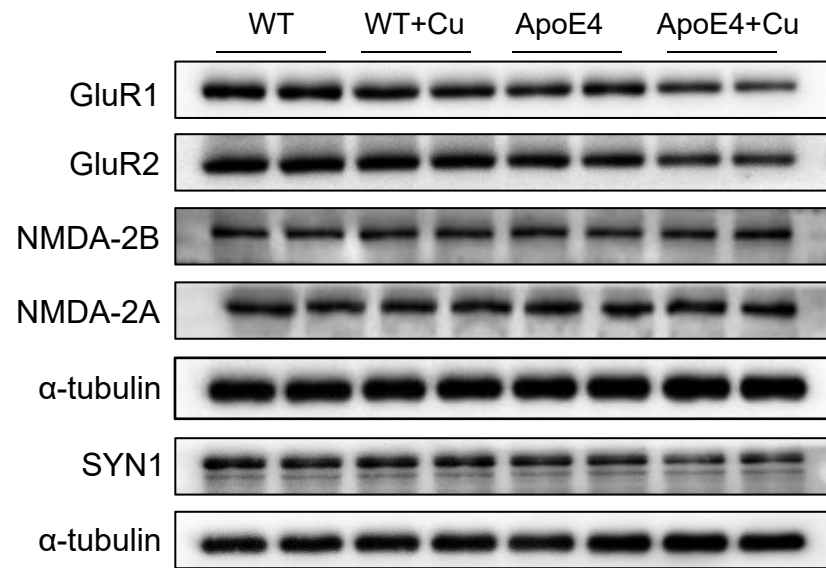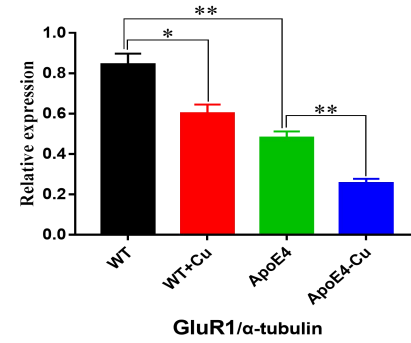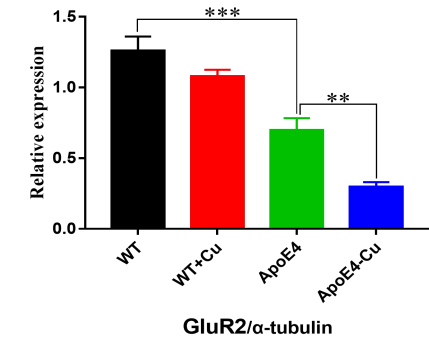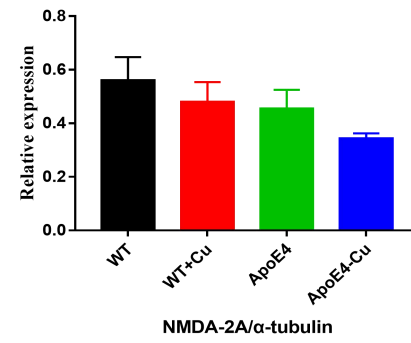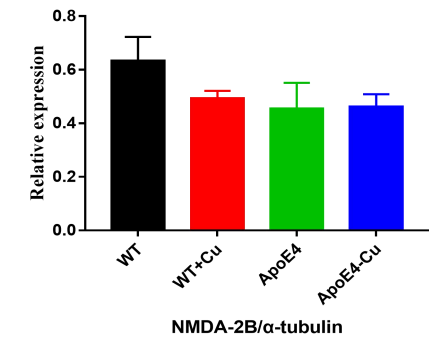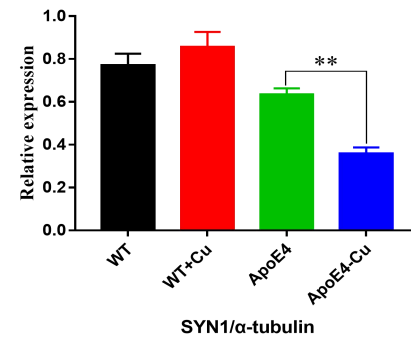

Supplementary Figure 2

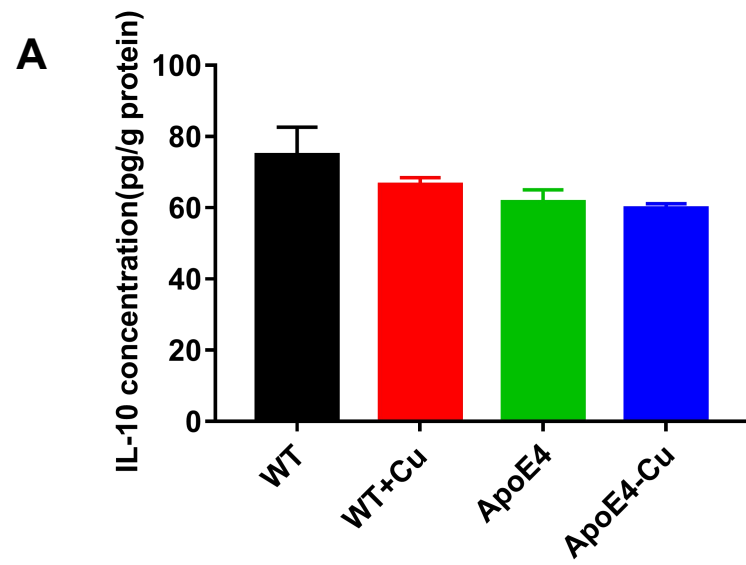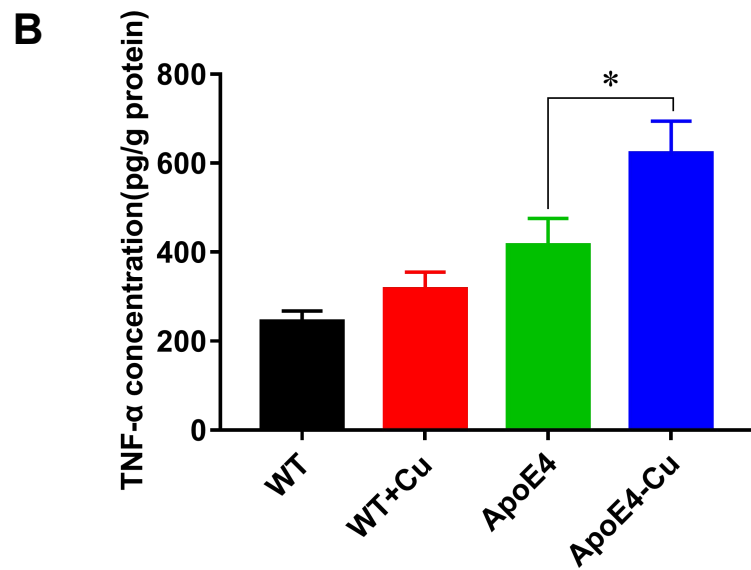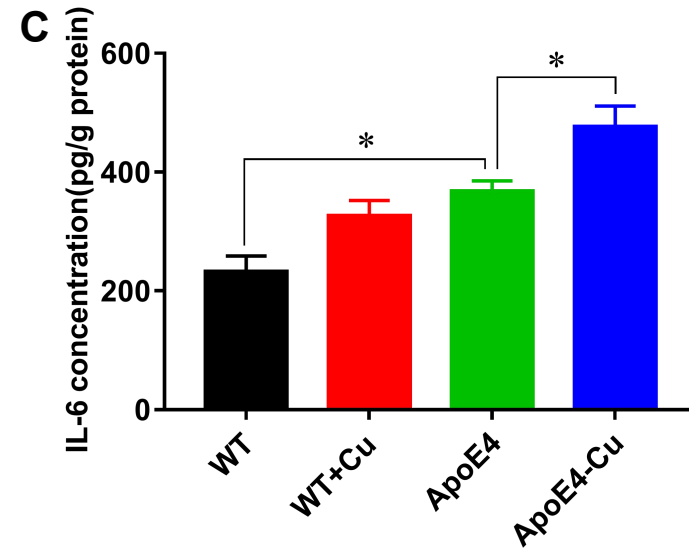

Supplement: f1 [file 6634181.f1.pdf]
